# Supplementary material
Source: PubMed Central journal article supplement (PMC5317273)
Supplement: NIHMS432549-supplement-S1.pdf [file NIHMS432549-supplement-S1.pdf]

**Phase I Clinical Study of Seneca Valley Virus (SVV-001), a Replication-Competent Picornavirus, in Advanced Solid Tumors with Neuroendocrine Features**

Charles M. Rudin<sup>1</sup>, John T. Poirier<sup>1</sup>, Neil N. Senzer<sup>2</sup>, Joseph Stephenson Jr.<sup>3</sup>, David Loesch<sup>4</sup>, Kevin D. Burroughs<sup>5</sup>, P. Seshidhar Reddy<sup>5</sup>, Christine L. Hann<sup>1</sup>, Paul L. Hallenbeck<sup>5</sup>

<sup>1</sup>Johns Hopkins University, Baltimore, MD, <sup>2</sup>Mary Crowley Cancer Research Center, Dallas, TX, <sup>3</sup>Cancer Center of the Carolinas, Greenville, SC, <sup>4</sup>Indianapolis, IN, <sup>5</sup>Neotropix, Inc., Malvern, PA

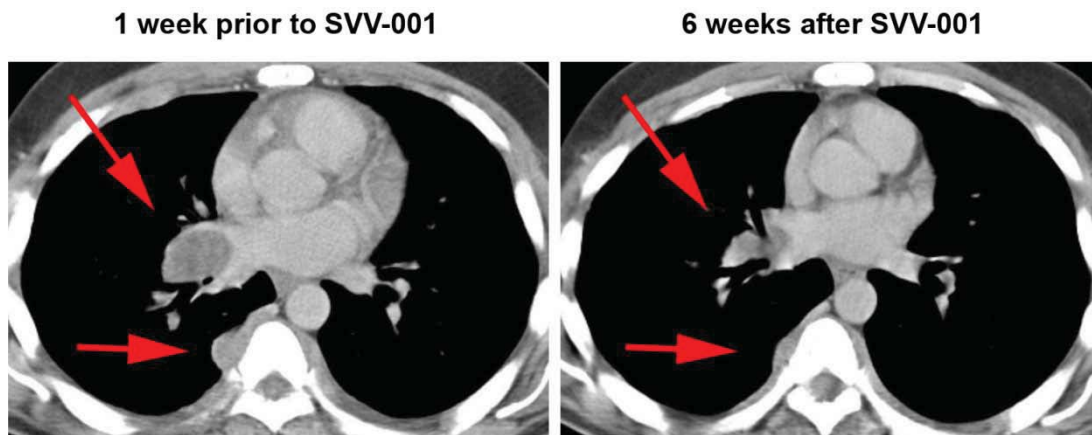

**Supplemental Figure. Serial CT scans demonstrating tumor response to SVV-001.** CT scan images from a patient with a poorly differentiated neuroendocrine tumor obtained prior to treatment and 6 weeks after treatment with SVV-001 ( $10^{10}$  vp/kg) are shown. This patient also had extensive abdominal disease, which remained stable but did not evidently decrease in size following SVV-001 administration.
